# Supplementary material for: Nasal administration of mitochondria reverses chemotherapy-induced cognitive deficits
Source: PubMed Central journal article supplement (PMC7847685; doi:10.7150/thno.53474), 2021-01-01
Supplement: thnov11p3109s1.pdf [file thnov11p3109s1.pdf]

## **Nasal Administration of Mitochondria Reverses Chemotherapy-Induced Cognitive Deficits**

Jenolyn F. Alexander, Alexandre V. Seua, Luis D. Arroyo, Pradipta Ray, Andi Wangzhou, Laura Heiß-Lückemann,

Manfred Schedlowski, Theodore Price, Annemieke Kavelaars, Cobi J. Heijnen

### **SUPPLEMENTARY FIGURES AND TABLES**

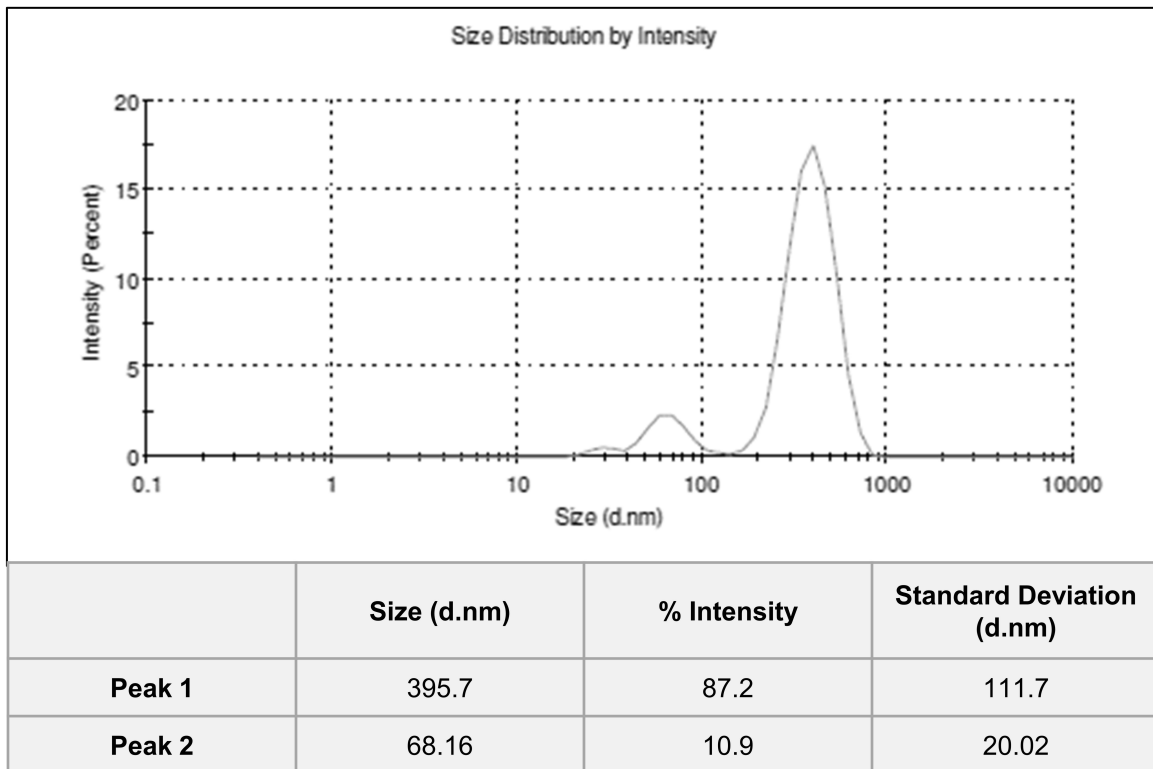

Figure S1. Average size of mitochondria isolated from human MSC

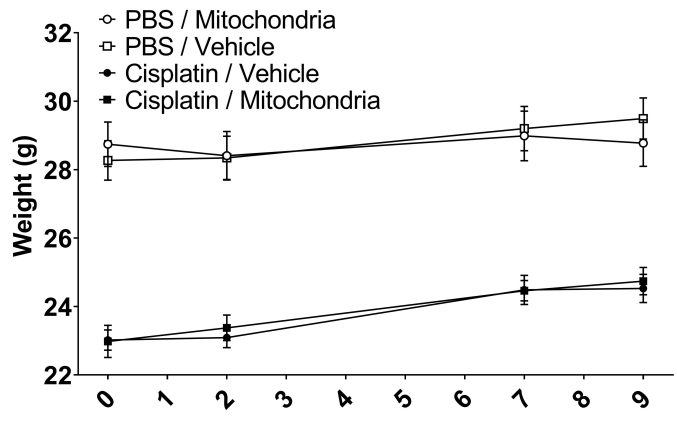

Figure S2. Body weight measurements of all treatment groups after nasal administration of mitochondria

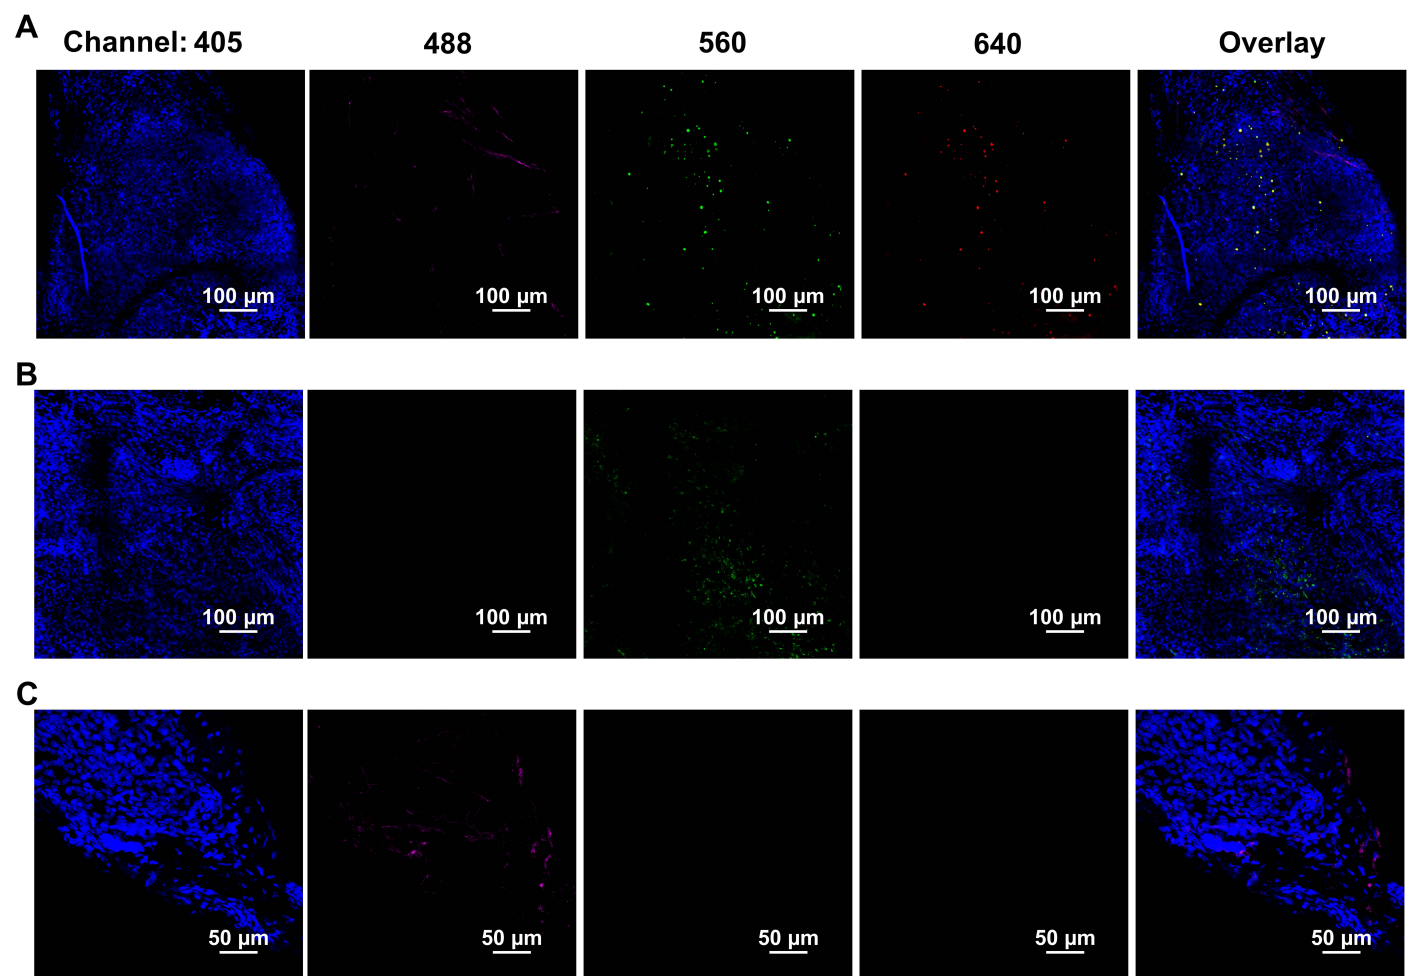

**Figure S3. No autofluorescence and no labeling of mitochondria with control IgG in meninges.** (A) Individual channels of meningeal olfactory region showing DAPI<sup>+</sup> nuclei (405 channel), Lyve-1<sup>+</sup> lymphatic vessels but no mitochondria-specific signal (488 channel), DsRed<sup>+</sup> mitochondria (560 channel), anti-human mitochondria<sup>+</sup> mitochondria (640 channel) and merged channels. (B) IgG isotype control for the anti-human mitochondria antibody showing DAPI<sup>+</sup> nuclei (405), no autofluorescence (488), DsRed<sup>+</sup> mitochondria (560), IgG control (640) and merged channels. The results show that there is no co-localization of the DsRed signal with the 488 signal or the signal from the control IgG antibody; scale bar 100  $\mu\text{m}$ . (C) Negative control showing DAPI<sup>+</sup> nuclei (405 channel), Lyve-1<sup>+</sup> lymphatic vessels (488 channel), no DsRed<sup>+</sup> signal (560), no anti-human mitochondria<sup>+</sup> signal (640) and merged channels in cisplatin-treated mouse that did not receive mitochondria; scale bar 50  $\mu\text{m}$ . Images taken with 20x objective.



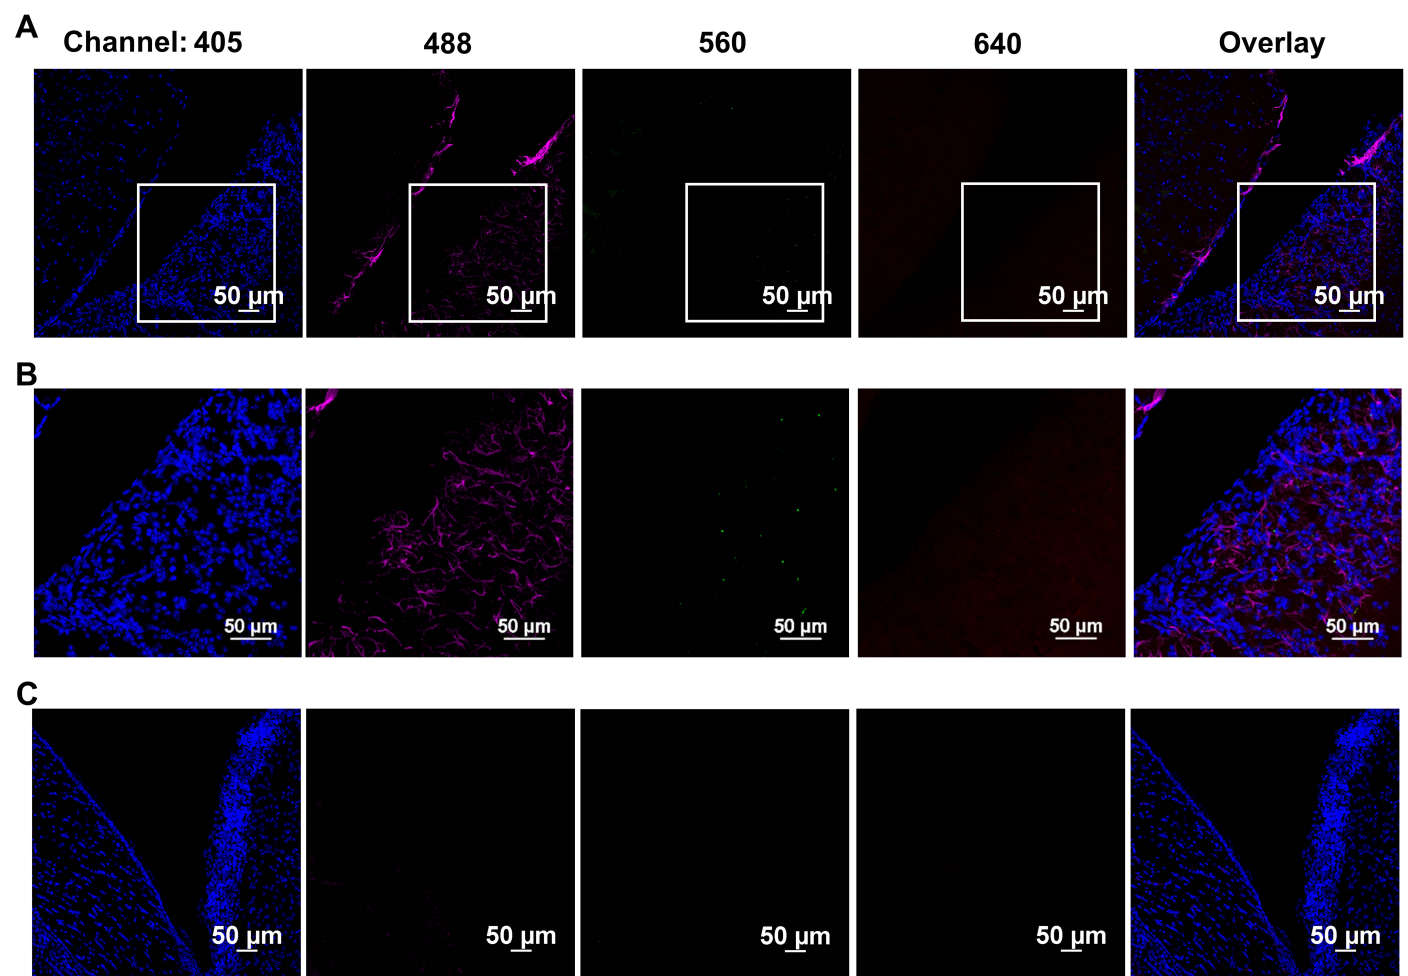

**Figure S4. No autofluorescence and no labeling of mitochondria with control IgG in brain.** (A) IgG isotype control for the anti-human mitochondria antibody in brain and (B) their corresponding enlarged images showing DAPI<sup>+</sup> nuclei (405), GFAP<sup>+</sup> cells (488), DsRed<sup>+</sup> mitochondria (560), IgG control (640) and merged channels. The results show that there is no co-localization of the DsRed signal with signal from the control IgG antibody. (C) Negative control showing DAPI<sup>+</sup> nuclei (405 channel), no autofluorescence (488 channel), no DsRed<sup>+</sup> signal (560), no anti-human mitochondria<sup>+</sup> signal (640) and merged channels in cisplatin-treated mouse that did not receive mitochondria; scale bar 50 μm. Images taken with 20x objective.

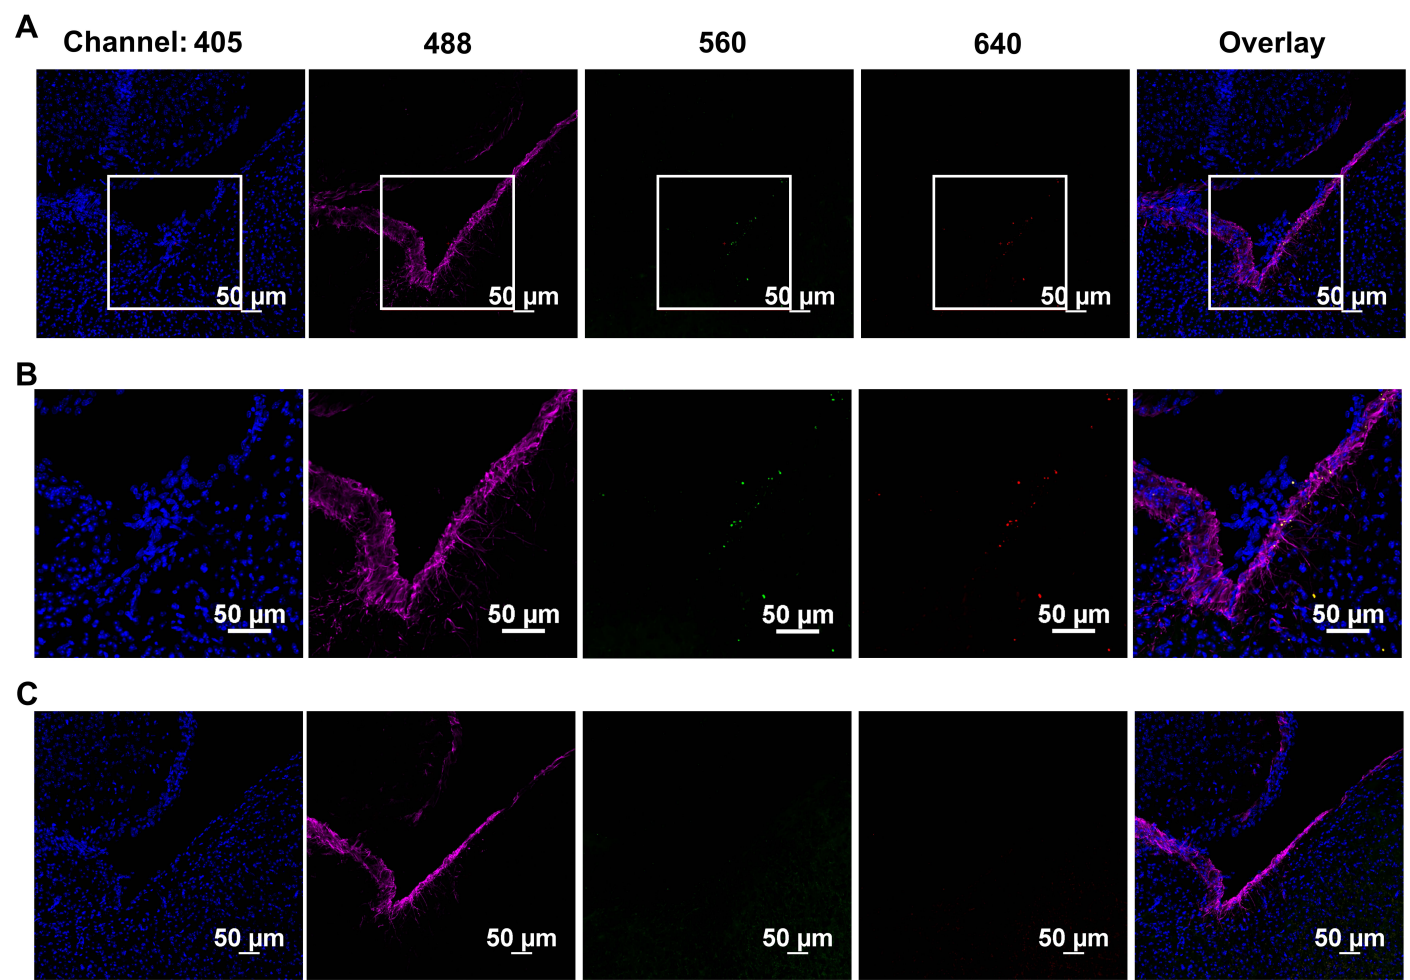

**Figure S5. Colocalization of DsRed<sup>+</sup> mitochondria with anti-human mitochondrial TFAM antibody.** (A) Individual channels of brain with (B) corresponding magnified images showing DAPI<sup>+</sup> nuclei (405 channel), GFAP<sup>+</sup> glial limitans (488 channel), DsRed<sup>+</sup> mitochondria (560 channel), anti-human mtTFA<sup>+</sup> mitochondria (640 channel) and merged channels which depict colocalization of DsRed and anti-human mtTFA<sup>+</sup> signals. (C) Negative control - brain of vehicle control mouse showing DAPI<sup>+</sup> nuclei (405), GFAP<sup>+</sup> glial limitans (488), no DsRed<sup>+</sup> mitochondria (560) no anti-human mtTFA<sup>+</sup> mitochondria (640) and merged channels; scale bar 50  $\mu$ m. Images taken with 20x objective.



### Intact Membranes

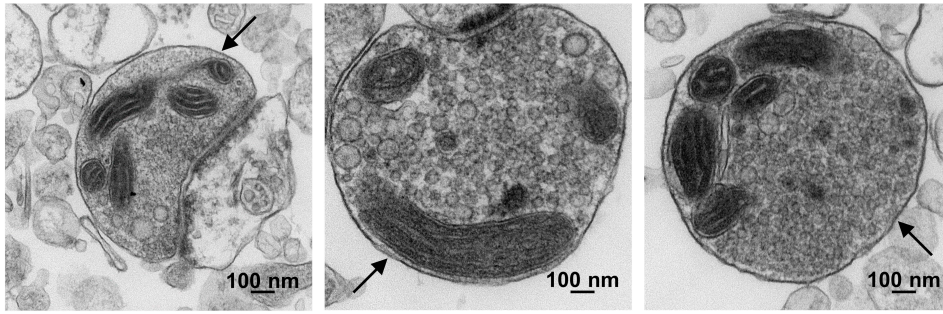

### Ruffled Membranes

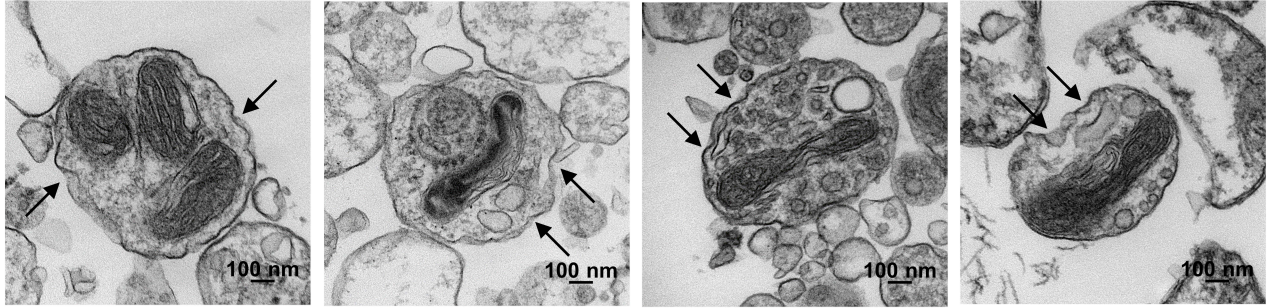

### Breaks in Membrane

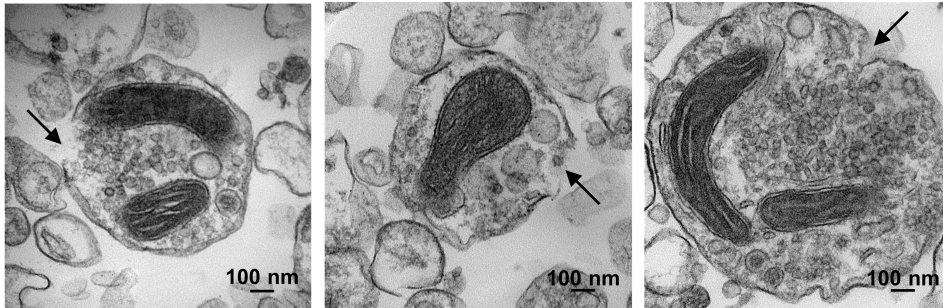

### Vesicle Leakage

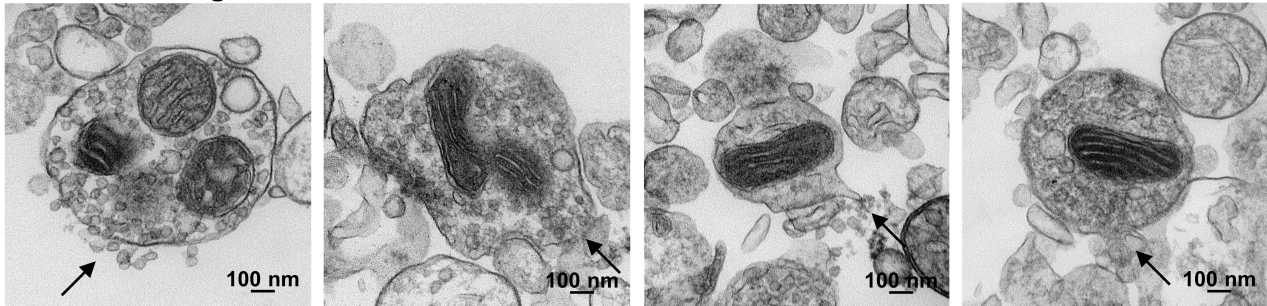

### Blebs

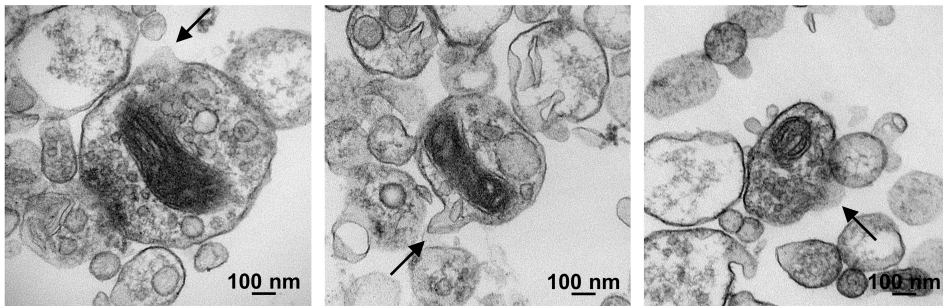

Figure S6. Criteria for identifying damaged synaptosome membrane

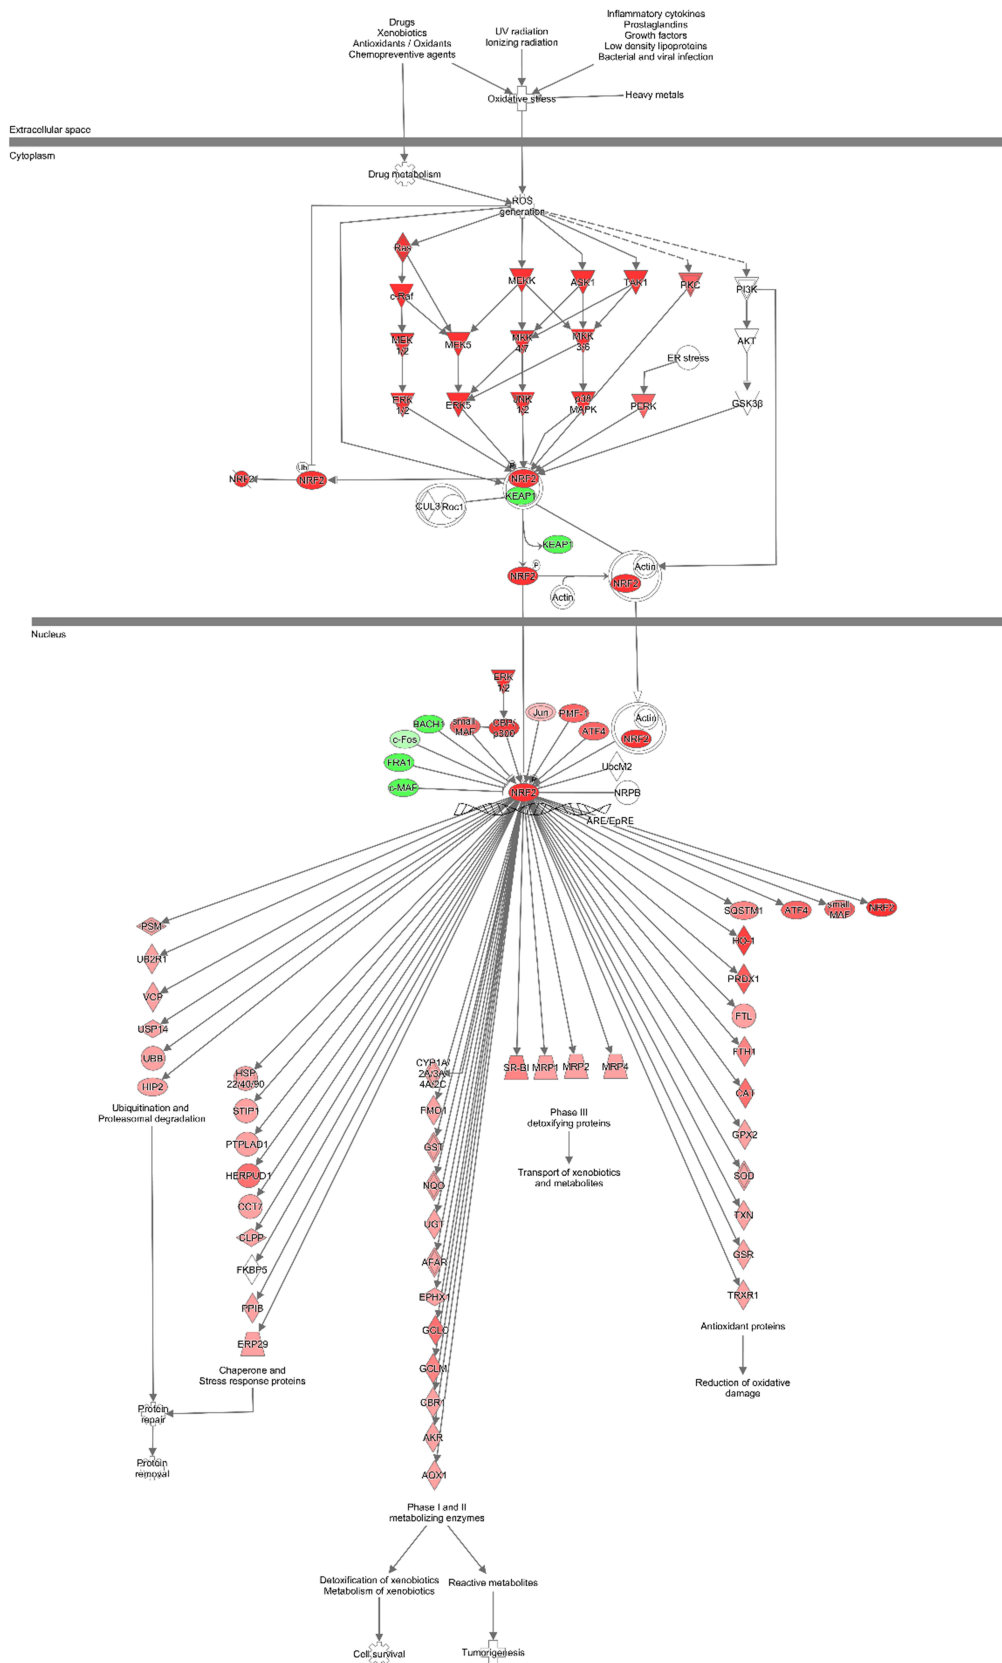

Figure S7. Expected activation state of *Nrf2*-mediated oxidative stress response as shown by IPA

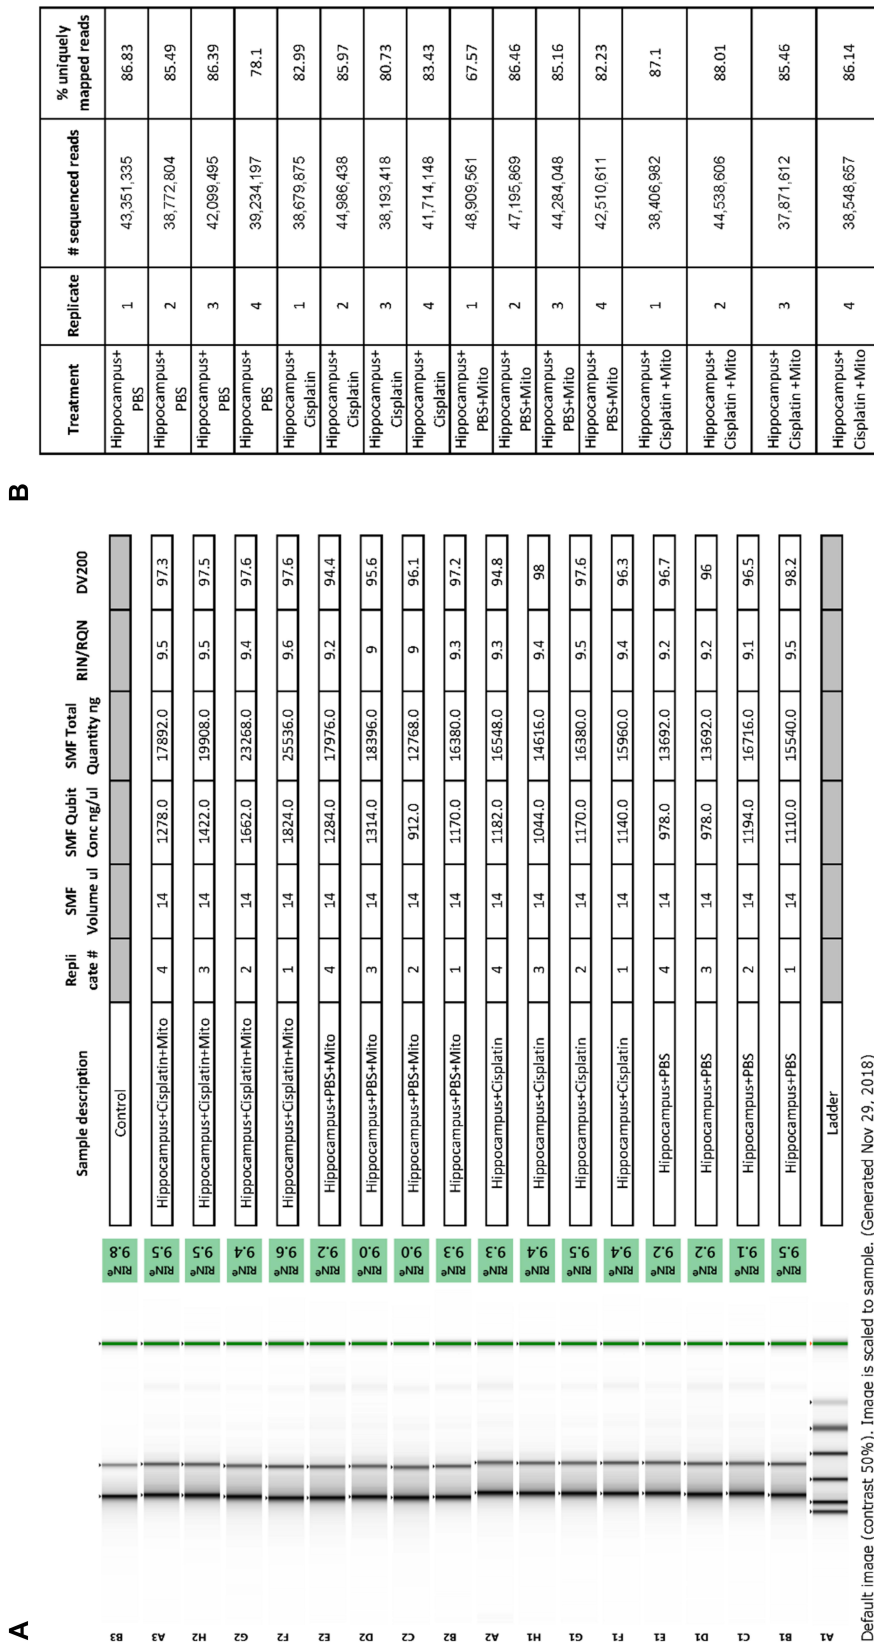

Figure S8. Quality control analysis of extracted RNA for RNA-sequencing



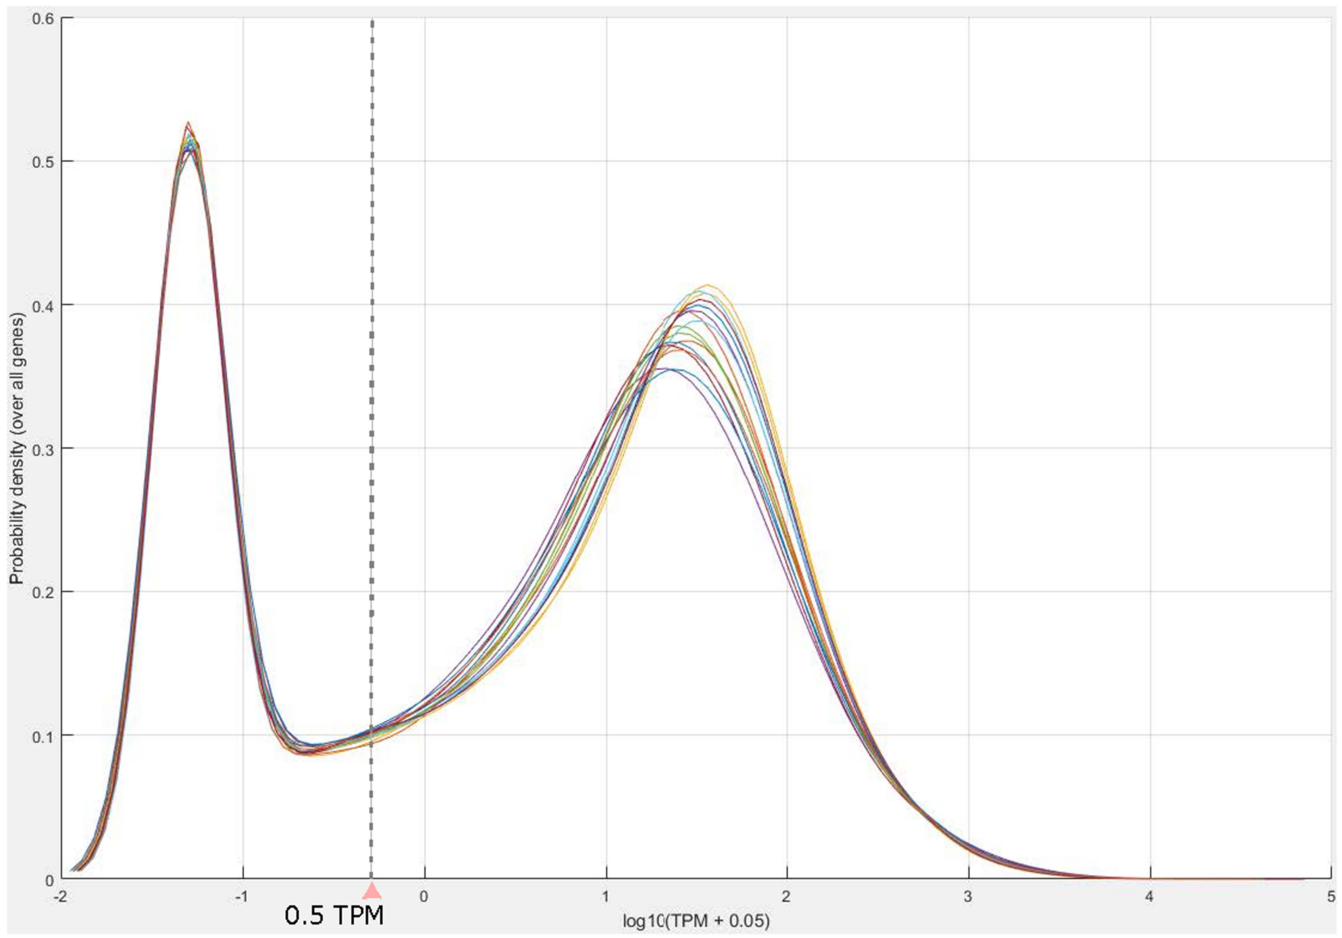

**Figure S9. Identification of stably expressed genes**

|                                                       | S1    | S2    | S3    | S4    | C1    | C2    | C3    | C4    | SM1   | SM2   | SM3   | SM4   | CM1   | CM2   | CM3   | CM4   |
|-------------------------------------------------------|-------|-------|-------|-------|-------|-------|-------|-------|-------|-------|-------|-------|-------|-------|-------|-------|
| <b>Gene Abundance<br/>(TPM &gt; 0.0)</b>              | 16130 | 15887 | 16074 | 15760 | 15891 | 16527 | 15843 | 15929 | 16109 | 16164 | 16188 | 16000 | 15919 | 16129 | 15841 | 15978 |
| <b>Stably Expressed<br/>Genes<br/>(TPM &gt;= 0.5)</b> | 14741 | 14566 | 14792 | 14394 | 14582 | 14956 | 14569 | 14600 | 14853 | 14836 | 14848 | 14676 | 14619 | 14821 | 14489 | 14611 |

|                                                                                                   | Cisplatin vs PBS | Cisplatin + Mitochondria vs<br>Cisplatin |
|---------------------------------------------------------------------------------------------------|------------------|------------------------------------------|
| <b>Stably Expressed Genes<br/>(TPM &gt;= 0.5)</b>                                                 | 14784            | 14736                                    |
| <b>Systematically Changed Genes<br/>(SSMD &gt;= 0.75)</b>                                         | 2673             | 2396                                     |
| <b>Systematically Differentially<br/>Expressed Genes<br/>(Fold Change &lt;1/1.2 and &gt; 1.2)</b> | 1813             | 1308                                     |

Table S1. Gene abundances, stably expressed and systematically differentially expressed gene values quantified

| Categories                                                                                                  | Function                               | Diseases or Functions Annotation       | Predicted Activation State | p-value  | Activation z-score |
|-------------------------------------------------------------------------------------------------------------|----------------------------------------|----------------------------------------|----------------------------|----------|--------------------|
| Nervous System Development and Function                                                                     | Coordination                           | Coordination                           | Increased                  | 2.50E-05 | 2.427              |
| Cell Morphology, Cellular Assembly and Organization, Function and Maintenance                               | Formation                              | Formation of cellular protrusions      | Increased                  | 5.40E-07 | 2.304              |
| DNA Replication, Recombination and Repair                                                                   | Metabolism                             | Metabolism of DNA                      | Increased                  | 4.66E-05 | 2.223              |
| Cellular Development, Growth and Proliferation, Nervous System Development and Function, Tissue Development | Neurogenesis                           | Neurogenesis of neuroepithelial cells  | Increased                  | 4.67E-05 | 2                  |
| Cellular Assembly and Organization                                                                          | Organization                           | Organization of organelle              | Decreased                  | 1.23E-05 | -2.138             |
| Developmental Disorder                                                                                      | Hypoplasia                             | Hypoplasia                             | Decreased                  | 3.05E-05 | -2.754             |
| Neurological Disease                                                                                        | Movement Disorder                      | Movement Disorders                     | Decreased                  | 3.56E-06 | -3.319             |
| Psychological Disorders                                                                                     | Hyperactive Behavior                   | Hyperactive behavior                   | Decreased                  | 3.99E-05 | -3.413             |
| Neurological Disease                                                                                        | Motor Dysfunction or Movement Disorder | Motor dysfunction or movement disorder | Decreased                  | 1.22E-06 | -3.869             |
| Organismal Survival                                                                                         | Morbidity or Mortality                 | Morbidity or mortality                 | Decreased                  | 1.91E-18 | -4.585             |
| Organismal Survival                                                                                         | Organismal Death                       | Organismal death                       | Decreased                  | 5.50E-18 | -4.755             |

**Table S2. Relevant functions predicted to be regulated by nasal administration of mitochondria in cisplatin-treated mice, as revealed by Ingenuity Pathway Analysis**



| Upstream Regulator                         | Molecule Type           | Predicted Activation State | Activation z score | P-Value of Overlap |
|--------------------------------------------|-------------------------|----------------------------|--------------------|--------------------|
| Tcf7l2                                     | transcription regulator | Activated                  | 3.433              | 0.00943            |
| Alpha Catenin                              | group                   | Activated                  | 3.207              | 0.00138            |
| Rictor                                     | other                   | Activated                  | 2.93               | 0.000782           |
| Dnmt3b                                     | enzyme                  | Activated                  | 2.828              | 0.414              |
| Ngf                                        | growth factor           | Activated                  | 2.816              | 2.12E-06           |
| Cd40                                       | transmembrane receptor  | Activated                  | 2.705              | 0.0849             |
| Ep400                                      | other                   | Activated                  | 2.63               | 0.00926            |
| Hsf1                                       | transcription regulator | Activated                  | 2.49               | 2.14E-05           |
| Cr1l                                       | other                   | Activated                  | 2.449              | 0.0088             |
| Il4                                        | cytokine                | Activated                  | 2.341              | 0.00119            |
| H1-6                                       | other                   | Activated                  | 2.333              | 0.0576             |
| H1f1                                       | other                   | Activated                  | 2.333              | 0.0576             |
| Jak1/2                                     | group                   | Activated                  | 2.309              | 0.00066            |
| Ybx1                                       | transcription regulator | Activated                  | 2.273              | 0.00245            |
| Aldh1a2                                    | enzyme                  | Activated                  | 2.236              | 0.0341             |
| let-7                                      | microRNA                | Inhibited                  | -2.22              | 0.00583            |
| Pkc(s)                                     | group                   | Inhibited                  | -2.231             | 0.127              |
| Efna5                                      | kinase                  | Inhibited                  | -2.236             | 0.0423             |
| Efna4                                      | kinase                  | Inhibited                  | -2.236             | 0.0907             |
| Efna1                                      | other                   | Inhibited                  | -2.236             | 0.316              |
| Efna3                                      | kinase                  | Inhibited                  | -2.236             | 0.098              |
| Hic1                                       | transcription regulator | Inhibited                  | -2.236             | 0.271              |
| Sparc                                      | other                   | Inhibited                  | -2.267             | 0.0481             |
| Hbb-b1                                     | transporter             | Inhibited                  | -2.309             | 0.00679            |
| Cd44                                       | other                   | Inhibited                  | -2.345             | 0.0158             |
| Tgfb1                                      | kinase                  | Inhibited                  | -2.557             | 0.00032            |
| Brd4                                       | kinase                  | Inhibited                  | -2.63              | 0.00425            |
| mir-181                                    | microRNA                | Inhibited                  | -2.828             | 0.00425            |
| mir-1                                      | microRNA                | Inhibited                  | -2.892             | 0.0223             |
| miR-1-3p (and other miRNAs w/seed GGAAUGU) | mature microRNA         | Inhibited                  | -2.957             | 0.0277             |

**Table S3. Top 15 upstream regulators predicted to be activated and top 15 predicted to be inhibited by nasal administration of mitochondria to cisplatin-treated mice by Ingenuity Pathway Analysis**
